# Supplementary material for: Comparison of Different Approaches to Surface Functionalization of Biodegradable Polycaprolactone Scaffolds
Source: PubMed Central journal article supplement (PMC6955782; doi:10.3390/nano9121769), 2019-12-12
Supplement: nanomaterials-09-01769-s001.pdf [file nanomaterials-09-01769-s001.pdf]

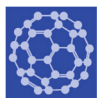

Article

# Comparison of Different Approaches to Surface Functionalization of Biodegradable Polycaprolactone Scaffolds

Elizaveta S. Permyakova <sup>1</sup>, Philipp V. Kiryukhantsev-Korneev <sup>1</sup>, Kristina Yu. Gudz <sup>1</sup>, Anton S. Konopatsky <sup>1</sup>, Josef Polčák, <sup>2,3</sup> Irina Y. Zhitnyak <sup>4</sup>, Natalia A. Gloushankova <sup>4</sup>, D. V. Shtansky <sup>1</sup> and Anton M. Manakhov <sup>5,\*</sup>

<sup>1</sup> National University of Science and Technology "MISIS", Leninsky prospect 4, Moscow, 119049, Russia  
[permyakova.elizaveta@gmail.com](mailto:permyakova.elizaveta@gmail.com) (E.S.P.); [kiruhancev-korneev@yandex.ru](mailto:kiruhancev-korneev@yandex.ru) (P.V.K-K.);  
[kristinagudz@mail.ru](mailto:kristinagudz@mail.ru) (K.Y.G.); [konopatskiy@isis.ru](mailto:konopatskiy@isis.ru) (A.S.K.); [shtansky@shs.misis.ru](mailto:shtansky@shs.misis.ru) (D.V.S.)

<sup>2</sup> CEITEC—Central European Institute of Technology, Brno University of Technology, Purkyňova 123, Brno, Czech Republic; [polcak@fme.vutbr.cz](mailto:polcak@fme.vutbr.cz)

<sup>3</sup> Institute of Physical Engineering, Brno University of Technology, Technická 2896/2, 616 69 Brno, Czech Republic

<sup>4</sup> N.N. Blokhin Russian Cancer Research Center, Kashirskoe shosse 24, Moscow 115478, Russia;  
[irishaz@mail.ru](mailto:irishaz@mail.ru) (I.Y.Z); [natglu@hotmail.com](mailto:natglu@hotmail.com) (N.A.G)

<sup>5</sup> Scientific Institute of Clinical and Experimental Lymphology—Branch of the ICG SB RAS, 2 Timakova str., 630060 Novosibirsk, Russian Federation

\* Correspondence: [ant-manahov@ya.ru](mailto:ant-manahov@ya.ru); Tel.: +7-915-8494059

Content:

- 1) Additional FTIR spectra
- 2) Microscope image for cell quantification analysis

- 1) Additional FTIR spectra

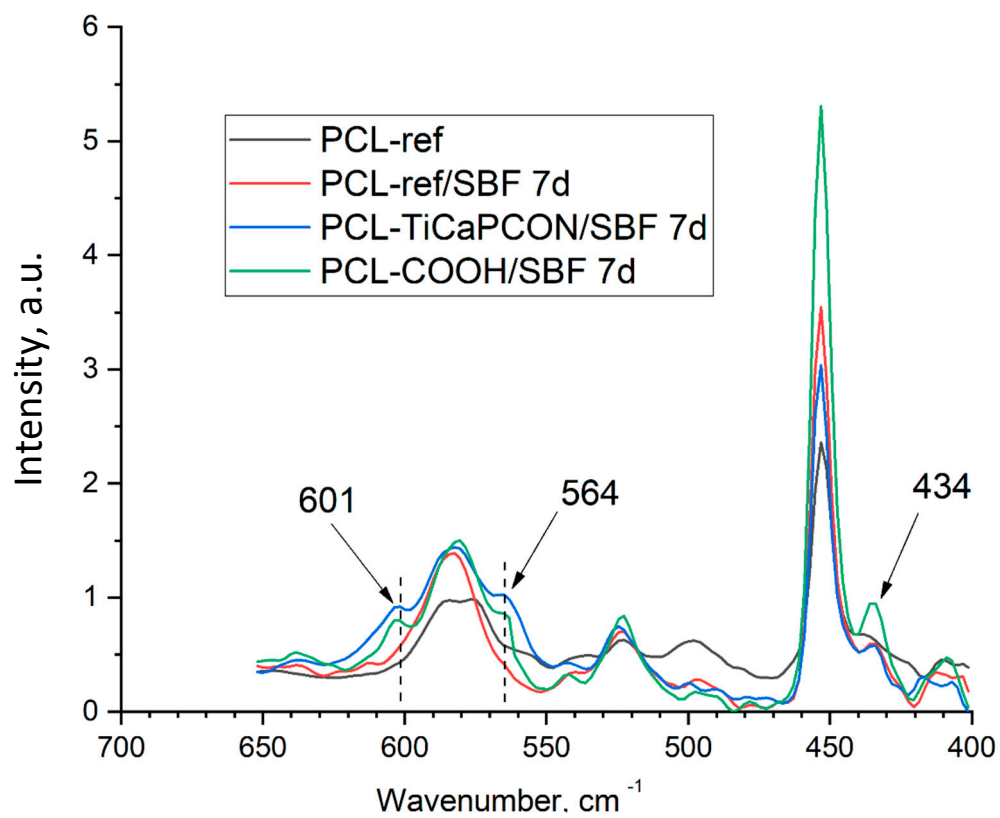

**Figure S1.** The comparison of PCL-ref-SBF, PCL-COOH-SBF and PCL-TiCaPCON-SBF after immersion into SBF for 7 days for identification of phosphate ions peaks.

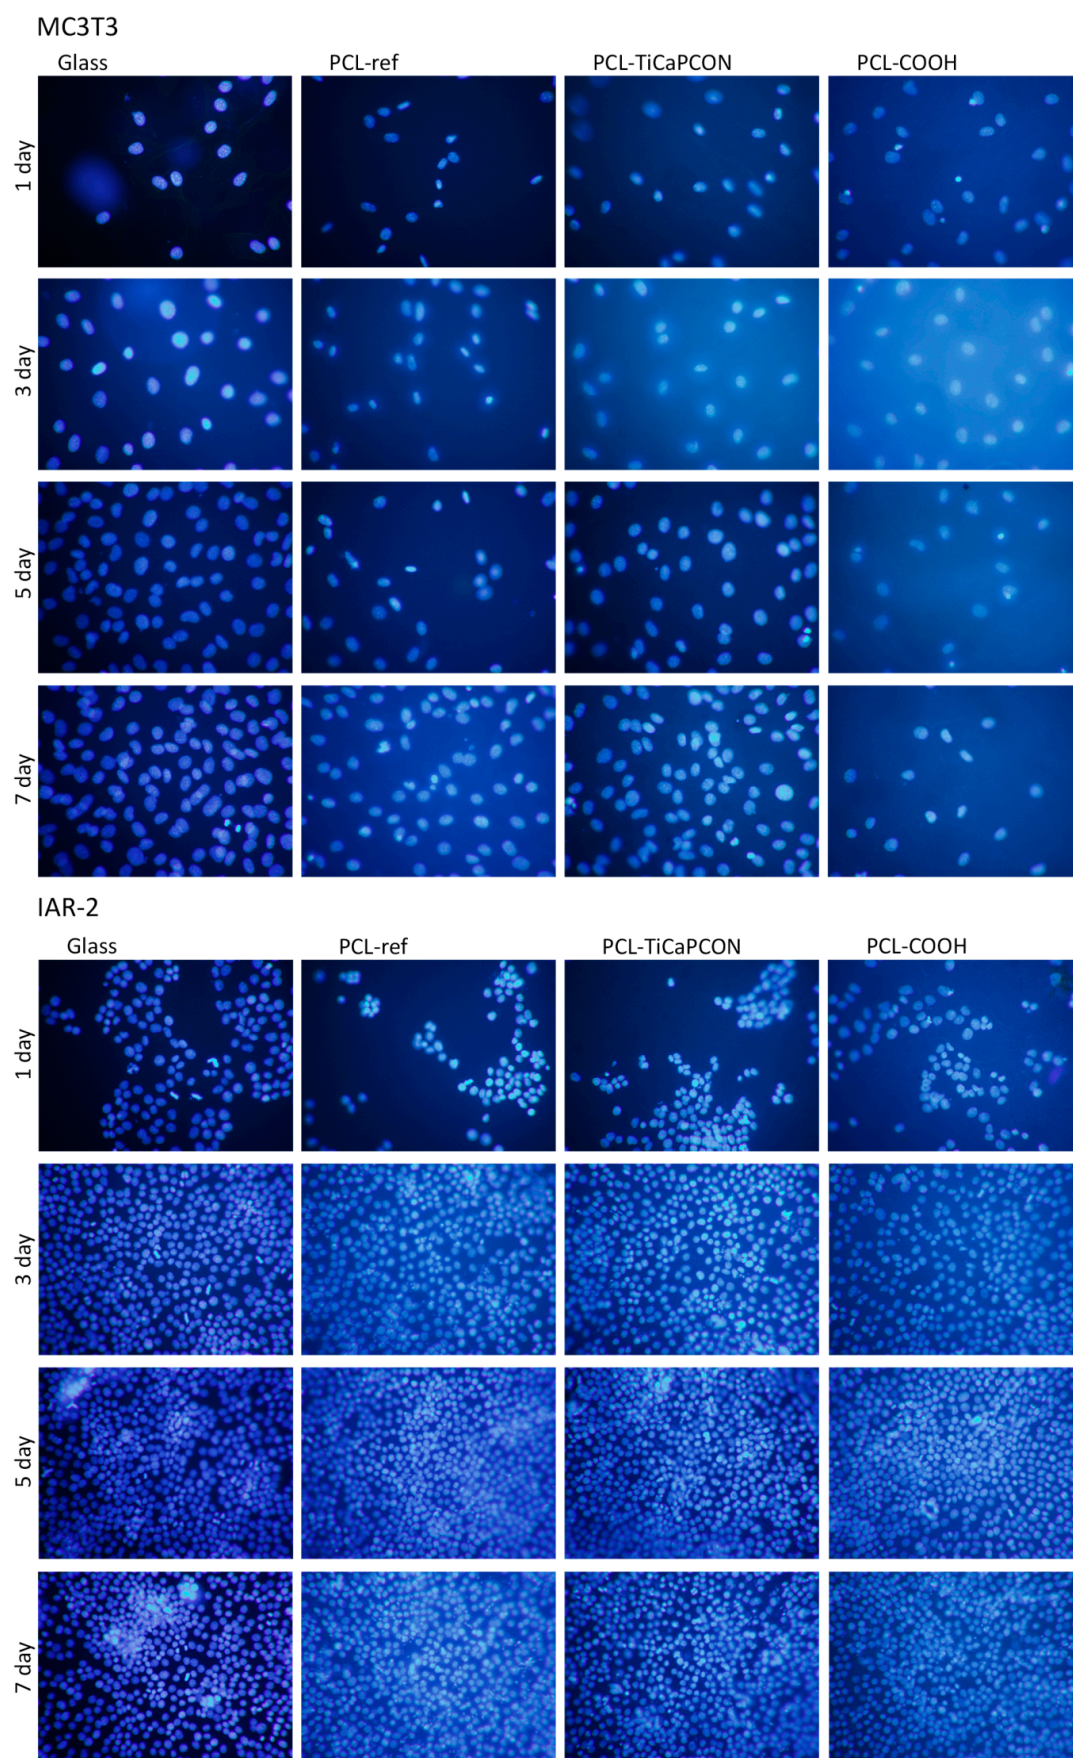

**Figure S2.** The example of the images for demonstration of the cell quantification.
